# Supplementary material for: Bioaccessibility of potentially toxic elements in mine residue particles
Source: Royal Society of Chemistry journal article supplement (doi:10.1039/d0em00447b), 2021-01-01
Supplement: d0em00447b2.pdf [file d0em00447b2.pdf]

### BIOACCESSIBILITY OF POTENTIALLY TOXIC ELEMENTS IN MINE RESIDUE PARTICLES

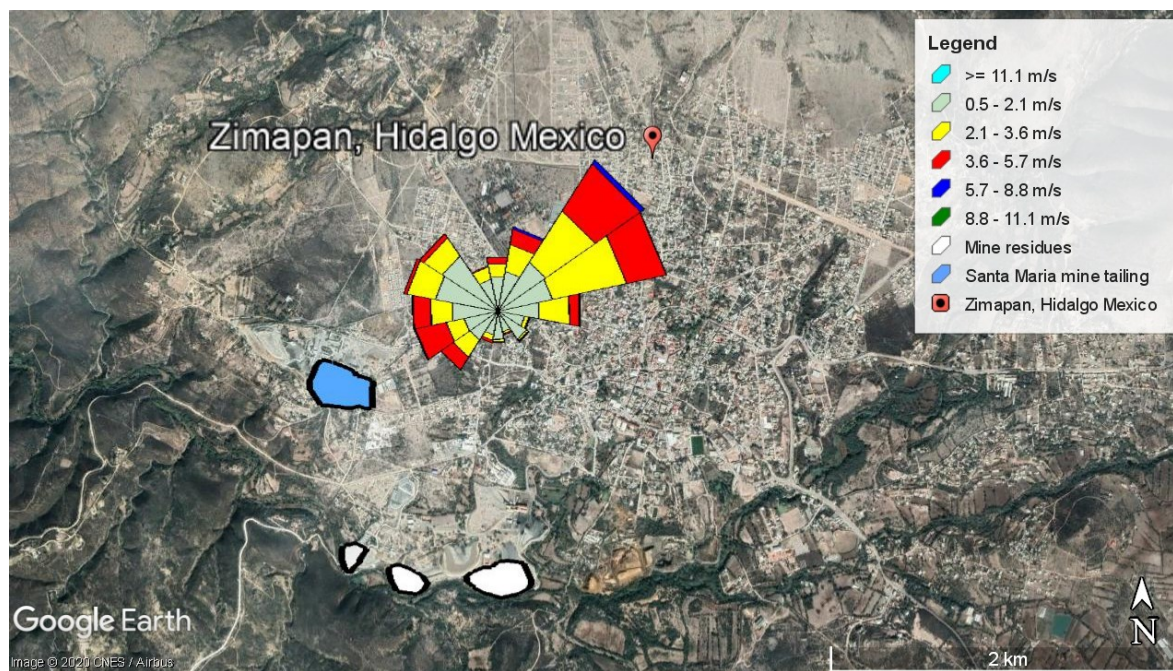

Fig. S2. Santa Maria mine residues location and the wind rose at Zimapan, Hidalgo, during the dry season.
