# Supplementary material for: Bioaccessibility of potentially toxic elements in mine residue particles
Source: Royal Society of Chemistry journal article supplement (doi:10.1039/d0em00447b), 2021-01-01
Supplement: d0em00447b3.pdf [file d0em00447b3.pdf]

### BIOACCESSIBILITY OF POTENTIALLY TOXIC ELEMENTS IN MINE RESIDUE PARTICLES

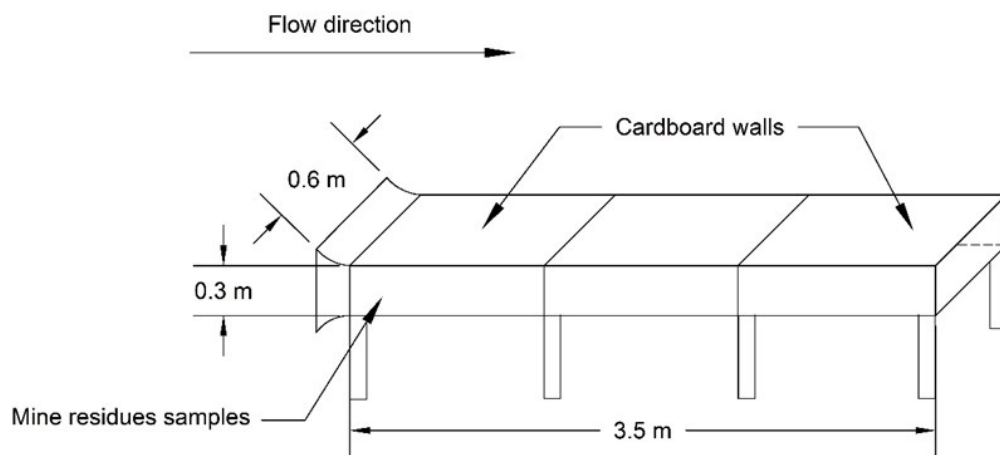

Fig. S3. Wind tunnel used for simulation of the dispersion of mine residues.
